# Supplementary material
Source: PubMed Central journal article supplement (PMC2746107)
Supplement: NIHMS137864-supplement-Tables_S1-S4.pdf [file NIHMS137864-supplement-Tables_S1-S4.pdf]

## Supplementary material

**Table S1 List of 57 genes that show larval arrest after RNAi inactivation**

| RNAi clone | Gene       | Brief description                                                      | Functional group    |
|------------|------------|------------------------------------------------------------------------|---------------------|
| I-5I22     | B0511.8    | Mitochondrial 28S ribosomal protein S30                                | Mitochondria        |
| I-6F08     | C01A2.3    | Cytochrome oxidase biogenesis protein                                  | Mitochondria        |
| II-3D02    | C01F1.2    | Putative cytochrome C oxidase assembly protein                         | Mitochondria        |
| II-7L05    | C09H10.3   | NADH:ubiquinone oxidoreductase, NDUFV1/51kDa subunit                   | Mitochondria        |
| II-7K16    | C14A4.14   | Mitochondrial 28S ribosomal protein S22                                | Mitochondria        |
| I-3O24     | F22D6.4    | NADH:ubiquinone oxidoreductase, NDUFS6/13 kDa subunit                  | Mitochondria        |
| I-4J22     | F26E4.4    | Cell death regulator Aven                                              | Mitochondria        |
| I-2O16     | F27C1.7    | Mitochondrial F1F0-ATP synthase, subunit OSCP/ATP5                     | Mitochondria        |
| II-7A04    | F54B3.3    | AAA+-type ATPase                                                       | Mitochondria        |
| I-2D03     | F59A3.3    | Mitochondrial/chloroplast ribosomal protein L24                        | Mitochondria        |
| I-5C22     | F59C6.5    | NADH-ubiquinone oxidoreductase, subunit NDUFB10/PDSW                   | Mitochondria        |
| II-6G09    | K01C8.6    | Mitochondrial ribosomal protein L10                                    | Mitochondria        |
| X-6J17     | R03E1.2    | ATPase membrane sector associated protein                              | Mitochondria        |
| II-7G09    | R53.4      | Mitochondrial F1F0-ATP synthase, subunit f                             | Mitochondria        |
| II-1K06    | T02H6.11   | Ubiquinol cytochrome c reductase, subunit QCR7                         | Mitochondria        |
| I-2P08     | T08B2.8    | Predicted mitochondrial ribosomal protein L23                          | Mitochondria        |
| II-5H24    | T09A5.5    | Putative NADH dehydrogenase                                            | Mitochondria        |
| X-1D12     | T14F9.1    | Vacuolar H <sup>+</sup> -ATPase V1 sector, subunit H                   | Mitochondria        |
| II-7F06    | VW02B12L.1 | Vacuolar H <sup>+</sup> -ATPase V0 sector, subunit a                   | Mitochondria        |
| I-3O12     | W01A8.4    | NADH-ubiquinone oxidoreductase B15 subunit                             | Mitochondria        |
| I-7B02     | Y47G6A.10  | AAA+-type ATPase containing the peptidase M41 domain                   | Mitochondria        |
| I-7G09     | Y63D3A.7   | NADH:ubiquinone oxidoreductase NDUFA2/B8 subunit                       | Mitochondria        |
| I-1L24     | ZK973.10   | NADH:ubiquinone oxidoreductase, NDUFS4/18 kDa subunit                  | Mitochondria        |
| I-2B19     | C09D4.5    | 60s ribosomal protein L19                                              | Translation         |
| II-7P06    | C47D12.6   | Threonyl-tRNA synthetase                                               | Translation         |
| I-2C07     | D1007.12   | 60s ribosomal protein L24                                              | Translation         |
| II-6N03    | D2013.7    | Translation initiation factor 3, subunit f (eIF-3f)                    | Translation         |
| II-6E20    | D2085.3    | Translation initiation factor 2B, epsilon subunit (eIF-2Bepsilon/GCD6) | Translation         |
| I-3O22     | F22D6.3    | Asparaginyl-tRNA synthetase                                            | Translation         |
| I-3D16     | F26A3.2    | Nuclear cap-binding protein complex                                    | Translation         |
| I-2H21     | F55F8.3    | WD40-repeat-containing subunit of the 18S rRNA processing complex      | Translation         |
| I-5C20     | F59C6.4    | Exosomal 3'-5' exoribonuclease complex subunit Rrp40                   | Translation         |
| I-1O18     | W01B11.3   | Ribosome biogenesis protein - Nop58p/Nop5p                             | Translation         |
| I-7J09     | Y39G10AR.8 | Translation initiation factor 2, gamma subunit (eIF-2gamma; GTPase)    | Translation         |
| I-7D04     | Y48G1A.4   | Nucleolar protein involved in 40S ribosome biogenesis                  | Translation         |
| I-4L13     | C17E4.5    | Splicing factor RNPS1, SR protein superfamily                          | Transcription       |
| X-5I11     | C33D3.1    | GATA-4/5/6 transcription factors                                       | Transcription       |
| I-2P20     | C48E7.2    | RNA polymerase III (C) subunit                                         | Transcription       |
| I-4H13     | F14B4.3    | RNA polymerase I, second largest subunit                               | Transcription       |
| I-2H23     | F55F8.4    | CBF1-interacting corepressor CIR and related proteins                  | Transcription       |
| I-2G04     | F56A3.2    | GIY-YIG type nuclease                                                  | Transcription       |
| I-3M11     | F57B10.1   | CREB/ATF family transcription factor                                   | Transcription       |
| II-5E09    | C56E6.1    | Transporter, ABC superfamily                                           | Signaling           |
| II-6L23    | D2013.5    | Dynamin-like GTP binding protein                                       | Signaling           |
| I-1B06     | F28H1.2    | Calponin                                                               | Signaling           |
| I-3I14     | T21G5.4    | PDZ domain                                                             | Signaling           |
| I-5G21     | C25A1.5    | Cytochrome b5 ::Sphingolipid fatty acid hydroxylase                    | Metabolism          |
| I-2I23     | F54D7.2    | sn-1,2-diacylglycerol ethanolamine- and cholinephosphotranferases      | Metabolism          |
| I-3G22     | K02F2.2    | S-adenosylhomocysteine hydrolase                                       | Metabolism          |
| I-2P06     | T08B2.7    | Hydroxyacyl-CoA dehydrogenase/enoyl-CoA hydratase                      | Metabolism          |
| I-2J01     | F55F8.5    | Microtubule binding protein YTM1 (contains WD40 repeats)               | Cell structure      |
| I-1F10     | R12E2.3    | 26S proteasome regulatory complex                                      | Protein degradation |
| II-7D06    | B0491.5    | Uncharacterized protein                                                | Unknown             |
| I-3L20     | F20G4.1    | Uncharacterized conserved protein                                      | Unknown             |
| II-6N11    | F42A8.1    | Uncharacterized protein                                                | Unknown             |
| I-7I06     | K11B4.1    | Uncharacterized conserved protein                                      | Unknown             |
| I-7J11     | Y39G10AR.7 | Unnamed protein                                                        | Unknown             |

RNAi inactivation of 57 genes caused larval arrest phenotypes based on the previous genome-wide screen performed by Kamath *et al.* (2003). 23 genes (40%) are involved in

mitochondrial functions; 12 genes are involved in mRNA translation (21%); 7 genes (12%) are involved transcription; 4 genes are involved in signal transduction (7%); 4 genes (7%) are involved in metabolism; 1 gene (2%) is involved in cellular function; 1 gene (2%) is involved in protein turnover; and 5 genes (9%) are uncharacterized with unknown functions.

**Table S2 An RNAi screen identified 23 novel genes with antagonistic pleiotropy functions in *C. elegans* development and aging**

| RNAi clone | Gene       | Brief description                                                 | Functional group | Blast E-value |          |          |
|------------|------------|-------------------------------------------------------------------|------------------|---------------|----------|----------|
|            |            |                                                                   |                  | Fly           | Mouse    | Human    |
| I-7J09     | Y39G10AR.8 | eIF-2 $\gamma$                                                    | Translation      | 6.4e-183      | 5.3e-188 | 3e-103   |
| II-6E20    | D2085.3    | eIF-2B $\epsilon$                                                 | Translation      | 3.3e-32       | 6e-36    | 6.7e-32  |
| II-6N03    | D2013.7    | eIF-3f                                                            | Translation      | 2.1e-37       | 1.9e-43  | 3.1e-43  |
| I-2B19     | C09D4.5    | 60s ribosomal protein L19                                         | Translation      | 2.5e-68       | 1e-46    | 8.9e-68  |
| I-1O18     | W01B11.3   | Ribosome biogenesis protein Nop58p/Nop5p                          | Translation      | 3.5e-137      | 4e-126   | 2.3e-140 |
| I-5C20     | F59C6.4    | 3'-5' exoribonuclease complex subunit involved in rRNA processing | Translation      | 7.6e-36       | 7.2e-37  | 2.3e-38  |
| I-7D04     | Y48G1A.4   | Nucleolar protein involved in 40S ribosome biogenesis             | Translation      | 8.8e-55       | 1.4e-39  | 2.9e-46  |
| II-7P06    | C47D12.6   | Threonyl-tRNA synthetase                                          | Translation      | 4.4e-257      | 1.1e-248 | 3.2e-247 |
| I-3O22     | F22D6.3    | Asparaginyl-tRNA synthetase                                       | Translation      | 6.3e-173      | 1.2e-164 | 4.4e-174 |
| I-2P20     | C48E7.2    | RNA polymerase III subunit                                        | Transcription    | 1.6e-36       | 2.1e-52  | 2.5e-45  |
| I-4H13     | F14B4.3    | RNA polymerase I subunit                                          | Transcription    | 1.1e-243      | 2.4e-269 | 2.2e-266 |
| II-7G09    | R53.4      | Mitochondrial F1F0-ATP synthase subunit f                         | Mitochondria     | 1.1e-11       | 5.2e-08  | 6.3e-05  |
| I-5C22     | F59C6.5    | NADH:ubiquinone oxidoreductase subunit NDUFB10/PDSW               | Mitochondria     | 4.3e-34       | 1.3e-15  | 6.5e-18  |
| I-1L24     | ZK973.10   | NADH:ubiquinone oxidoreductase subunit NDUF54                     | Mitochondria     | 9.2e-31       | 5.4e-36  | 4.3e-35  |
| II-3D02    | C01F1.2    | Cytochrome C oxidase assembly protein                             | Mitochondria     | 2.8e-55       | 5.3e-54  | 3.8e-54  |
| II-6G09    | K01C8.6    | Mitochondrial ribosomal protein L10                               | Mitochondria     | 1e-08         | 2.9e-08  | 3.5e-05  |
| I-2D03     | F59A3.3    | Mitochondrial ribosomal protein L24                               | Mitochondria     | 2.1e-36       | 1.5e-25  | 1.5e-27  |
| I-5I22     | B0511.8    | Mitochondrial 28S ribosomal protein S30                           | Mitochondria     | 0.0016        | 1.2e-07  | 1.3e-06  |
| I-7B02     | Y47G6A.10  | AAA+-type ATPase                                                  | Mitochondria     | 5e-234        | 2e-232   | 3.3e-232 |
| I-4J22     | F26E4.4    | Cell death regulator Aven                                         | Mitochondria     | 1.3e-08       | 0.0032   | 0.00028  |
| II-5E09    | C56E6.1    | ABC superfamily transporter                                       | Signaling        | 1.8e-30       | 7.2e-41  | 7.5e-43  |
| I-7I06     | K11B4.1    | Uncharacterized conserved protein                                 | Unkown           | 5.7e-17       | 1.1e-05  | 1.1e-05  |
| II-7D06    | B0491.5    | Uncharacterized protein                                           | Unkown           | 0.0014        | 3.6      | 9.2      |

RNAi inactivation of 23 genes during adult extends lifespan. 9 genes (39%) are involved in mRNA translation; 9 genes (39%) are involved in mitochondrial functions; 2 genes (9%) are involved transcription; 1 genes are involved in signal transduction (4%); and 2 genes (9%) are uncharacterized with unknown functions. Blast-P analysis showed that most of the 23 genes have homologs/orthologs in other organisms with high sequence similarity.

**Table S3 Lifespan extension in different genetic backgrounds**

| Gene         | N2 lifespan |     |                   |                |                | <i>daf-2(e1370)</i> lifespan |     |                   |                |                | <i>daf-16(mu86); daf-2(e1370)</i> lifespan |     |                   |                |                | <i>eat-2(ad465)</i> lifespan |     |                   |                |                |
|--------------|-------------|-----|-------------------|----------------|----------------|------------------------------|-----|-------------------|----------------|----------------|--------------------------------------------|-----|-------------------|----------------|----------------|------------------------------|-----|-------------------|----------------|----------------|
|              | Mean        | Max | Ext. <sup>a</sup> | n <sup>b</sup> | p <sup>c</sup> | Mean                         | Max | Ext. <sup>a</sup> | n <sup>b</sup> | p <sup>c</sup> | Mean                                       | Max | Ext. <sup>a</sup> | n <sup>b</sup> | p <sup>c</sup> | Mean                         | Max | Ext. <sup>a</sup> | n <sup>b</sup> | p <sup>c</sup> |
| Control RNAi | 20.3        | 28  | /                 | 114            | /              | 33.9                         | 58  | /                 | 85             | /              | 11.9                                       | 15  | /                 | 66             | /              | 22.9                         | 34  | /                 | 184            | /              |
| Y39G10AR.8   | 25.2        | 38  | 24%               | 86             | <0.0001        | 47.8                         | 68  | 41%               | 107            | <0.0001        | 13.0                                       | 15  | 9%                | 85             | 0.0007         | 30.2                         | 40  | 32%               | 109            | <0.0001        |
| D2085.3      | 24.0        | 32  | 18%               | 90             | <0.0001        | 49.2                         | 74  | 45%               | 101            | <0.0001        | 13.3                                       | 17  | 12%               | 66             | <0.0001        | 28.1                         | 38  | 23%               | 95             | <0.0001        |
| D2013.7      | 25.9        | 42  | 28%               | 87             | <0.0001        | 44.5                         | 70  | 31%               | 113            | <0.0001        | 13.5                                       | 19  | 13%               | 82             | <0.0001        | 32.3                         | 42  | 41%               | 83             | <0.0001        |
| C09D4.5      | 22.5        | 32  | 11%               | 115            | <0.0001        | 50.9                         | 72  | 50%               | 98             | <0.0001        | 13.9                                       | 17  | 17%               | 59             | <0.0001        | 28.3                         | 38  | 24%               | 106            | <0.0001        |
| W01B11.3     | 23.4        | 32  | 15%               | 106            | <0.0001        | 51.1                         | 72  | 51%               | 68             | <0.0001        | 13.3                                       | 16  | 12%               | 75             | <0.0001        | 30.8                         | 42  | 35%               | 94             | <0.0001        |
| F59C6.4      | 22.7        | 32  | 12%               | 84             | <0.0001        | 45.5                         | 68  | 34%               | 90             | <0.0001        | 13.6                                       | 18  | 14%               | 63             | <0.0001        | 29.2                         | 40  | 28%               | 64             | <0.0001        |
| Y48G1A.4     | 24.5        | 40  | 21%               | 99             | <0.0001        | 47.2                         | 66  | 39%               | 101            | <0.0001        | 13.1                                       | 15  | 10%               | 51             | 0.0010         | 27.3                         | 36  | 19%               | 71             | <0.0001        |
| C47D12.6     | 22.8        | 30  | 12%               | 65             | <0.0001        | 40.3                         | 58  | 19%               | 72             | 0.0026         | 12.9                                       | 16  | 8%                | 73             | 0.0019         | 25.3                         | 34  | 11%               | 66             | 0.0060         |
| F22D6.3      | 22.5        | 36  | 11%               | 108            | <0.0001        | 43.9                         | 64  | 30%               | 96             | <0.0001        | 13.0                                       | 16  | 9%                | 86             | 0.0005         | 29.2                         | 40  | 28%               | 83             | <0.0001        |
| C48E7.2      | 25.5        | 40  | 26%               | 105            | <0.0001        | 43.6                         | 66  | 29%               | 109            | <0.0001        | 13.6                                       | 19  | 14%               | 70             | <0.0001        | 30.2                         | 42  | 32%               | 57             | <0.0001        |
| F14B4.3      | 23.4        | 36  | 15%               | 96             | <0.0001        | 44.4                         | 64  | 31%               | 113            | <0.0001        | 13.0                                       | 17  | 9%                | 59             | 0.0039         | 29.1                         | 40  | 27%               | 76             | <0.0001        |
| R53.4        | 24.3        | 32  | 20%               | 111            | <0.0001        | 53.3                         | 74  | 57%               | 112            | <0.0001        | 13.0                                       | 19  | 9%                | 82             | 0.0012         | 32.8                         | 44  | 43%               | 76             | <0.0001        |
| F59C6.5      | 23.6        | 36  | 16%               | 102            | <0.0001        | 50.4                         | 70  | 49%               | 101            | <0.0001        | 13.1                                       | 15  | 10%               | 60             | 0.0010         | 28.2                         | 38  | 23%               | 92             | <0.0001        |
| ZK973.10     | 23.7        | 36  | 17%               | 107            | <0.0001        | 44.5                         | 64  | 31%               | 103            | <0.0001        | 13.2                                       | 16  | 11%               | 54             | 0.0001         | 29.8                         | 42  | 30%               | 55             | <0.0001        |
| C01F1.2      | 25.0        | 38  | 23%               | 89             | <0.0001        | 42.1                         | 66  | 24%               | 106            | <0.0001        | 13.7                                       | 17  | 15%               | 59             | <0.0001        | 26.7                         | 42  | 17%               | 107            | <0.0001        |
| K01C8.6      | 23.7        | 38  | 17%               | 107            | <0.0001        | 46.6                         | 70  | 38%               | 108            | <0.0001        | 13.4                                       | 16  | 13%               | 50             | <0.0001        | 28.9                         | 42  | 26%               | 67             | <0.0001        |
| F59A3.3      | 23.1        | 36  | 14%               | 97             | <0.0001        | 43.3                         | 68  | 28%               | 108            | <0.0001        | 13.5                                       | 16  | 12%               | 75             | <0.0001        | 29.4                         | 40  | 28%               | 75             | <0.0001        |
| B0511.8      | 24.5        | 36  | 21%               | 97             | <0.0001        | 48.7                         | 74  | 44%               | 109            | <0.0001        | 13.9                                       | 19  | 17%               | 55             | <0.0001        | 28.7                         | 38  | 25%               | 56             | <0.0001        |
| Y47G6A.10    | 25.2        | 40  | 24%               | 109            | <0.0001        | 48.6                         | 68  | 43%               | 105            | <0.0001        | 13.4                                       | 18  | 13%               | 89             | <0.0001        | 28.6                         | 38  | 25%               | 68             | <0.0001        |
| F26E4.4      | 23.8        | 38  | 17%               | 91             | <0.0001        | 43.0                         | 62  | 27%               | 105            | <0.0001        | 13.0                                       | 15  | 9%                | 65             | 0.0008         | 27.4                         | 34  | 20%               | 62             | <0.0001        |
| C56E6.1      | 23.5        | 36  | 16%               | 87             | <0.0001        | 46.9                         | 68  | 38%               | 97             | <0.0001        | 13.6                                       | 16  | 14%               | 71             | <0.0001        | 29.1                         | 40  | 27%               | 39             | <0.0001        |
| K11B4.1      | 23.6        | 36  | 16%               | 83             | <0.0001        | 43.8                         | 68  | 29%               | 71             | <0.0001        | 13.2                                       | 17  | 11%               | 59             | 0.0001         | 29.4                         | 44  | 28%               | 87             | <0.0001        |
| B0491.5      | 23.6        | 36  | 16%               | 95             | <0.0001        | 48.3                         | 66  | 43%               | 105            | <0.0001        | 13.0                                       | 15  | 9%                | 66             | <0.0001        | 30.8                         | 42  | 35%               | 67             | <0.0001        |

RNAi inactivation of the 23 identified genes during adult cause lifespan extension in the wild-type N2, *daf-2*, *daf-16*; *daf-2* and *eat-2* backgrounds. All lifespan experiments were performed at 20°C. Lifespan of animals treated with different RNAi were compared with those treated with the control RNAi using the log-rank method.

<sup>a</sup> Mean lifespan extension compared to animals treated with the control RNAi.

<sup>b</sup> Total numbers of animals scored.

<sup>c</sup> *p*-values were calculated using the log-rank method (Graphic Prism 4).

**Table S4 Heat stress, oxidative stress and fecundity assays**

| Gene       | Brief description                                     | Functional group | Heat stress <sup>a</sup> |                |                | Oxidative stress <sup>c</sup> |                |                | Fecundity <sup>f</sup>  |                |                |
|------------|-------------------------------------------------------|------------------|--------------------------|----------------|----------------|-------------------------------|----------------|----------------|-------------------------|----------------|----------------|
|            |                                                       |                  | Extension <sup>b</sup>   | n <sup>c</sup> | p <sup>d</sup> | Extension <sup>b</sup>        | n <sup>c</sup> | p <sup>d</sup> | Brood size <sup>g</sup> | n <sup>c</sup> | p <sup>h</sup> |
| /          | Control RNAi                                          | /                | /                        | 167            | /              | /                             | 33             | /              | 330.2 ± 6.4             | 36             | /              |
| Y39G10AR.8 | eIF-2γ                                                | Translation      | 11%                      | 37             | 0.0021         | 51%                           | 43             | <0.0001        | 29.4 ± 1.9              | 10             | <0.0001        |
| D2085.3    | eIF-2Bε                                               | Translation      | -3%                      | 35             | 0.8083         | 10%                           | 34             | 0.1069         | 94.7 ± 7.7              | 11             | <0.0001        |
| D2013.7    | eIF-3f                                                | Translation      | 16%                      | 40             | <0.0001        | 46%                           | 33             | <0.0001        | 52.5 ± 2.6              | 12             | <0.0001        |
| C09D4.5    | rpl-19                                                | Translation      | 10%                      | 39             | 0.0084         | 54%                           | 45             | <0.0001        | 49.8 ± 5.4              | 10             | <0.0001        |
| W01B11.3   | Ribosome biogenesis protein Nop58p/Nop5p              | Translation      | 17%                      | 47             | <0.0001        | 0%                            | 36             | 0.8704         | 192.0 ± 15.6            | 10             | <0.0001        |
| F59C6.4    | 3'-5' exoribonuclease involved in rRNA processing     | Translation      | 11%                      | 62             | 0.0005         | 8%                            | 44             | 0.3722         | 264.4 ± 10.3            | 11             | <0.0001        |
| Y48G1A.4   | Nucleolar protein involved in 40S ribosome biogenesis | Translation      | 8%                       | 31             | 0.0422         | 67%                           | 32             | <0.0001        | 233.2 ± 13.9            | 13             | <0.0001        |
| C47D12.6   | Threonyl-tRNA synthetase                              | Translation      | 11%                      | 43             | 0.0032         | 0%                            | 11             | 0.8757         | 68.2 ± 9.4              | 11             | <0.0001        |
| F22D6.3    | Asparaginyl-tRNA synthetase                           | Translation      | 15%                      | 51             | <0.0001        | -10%                          | 42             | 0.0880         | 67.1 ± 7.2              | 12             | <0.0001        |
| C48E7.2    | RNA polymerase III subunit                            | Transcription    | 12%                      | 48             | <0.0001        | 54%                           | 23             | <0.0001        | 307.9 ± 12.5            | 12             | 0.0999         |
| F14B4.3    | RNA polymerase I subunit                              | Transcription    | 7%                       | 35             | 0.0991         | -8%                           | 43             | 0.1575         | 264.1 ± 13.7            | 13             | <0.0001        |
| R53.4      | Mitochondrial F1F0-ATP synthase subunit f             | Mitochondria     | 19%                      | 50             | <0.0001        | 44%                           | 38             | <0.0001        | 73.4 ± 8.5              | 11             | <0.0001        |
| F59C6.5    | NADH:ubiquinone oxidoreductase subunit NDUF10/PDSW    | Mitochondria     | 17%                      | 48             | <0.0001        | 41%                           | 35             | <0.0001        | 174.4 ± 12.8            | 13             | <0.0001        |
| ZK973.10   | NADH:ubiquinone oxidoreductase subunit NDUF54         | Mitochondria     | 16%                      | 45             | <0.0001        | 3%                            | 35             | 0.7561         | 252.3 ± 20.1            | 9              | <0.0001        |
| C01F1.2    | Cytochrome C oxidase assembly protein                 | Mitochondria     | 10%                      | 32             | 0.0051         | 15%                           | 42             | 0.0242         | 237.0 ± 19.3            | 12             | <0.0001        |
| K01C8.6    | Mitochondrial rpl-10                                  | Mitochondria     | 8%                       | 42             | 0.0221         | 28%                           | 33             | 0.0043         | 186.4 ± 15.3            | 10             | <0.0001        |
| F59A3.3    | Mitochondrial rpl-24                                  | Mitochondria     | 5%                       | 40             | 0.1515         | -5%                           | 43             | 0.5427         | 284.5 ± 10.8            | 13             | 0.0007         |
| B0511.8    | Mitochondrial rps-30                                  | Mitochondria     | 21%                      | 67             | <0.0001        | 49%                           | 45             | <0.0001        | 202.5 ± 13.6            | 11             | <0.0001        |
| Y47G6A.10  | AAA+-type ATPase                                      | Mitochondria     | 6%                       | 37             | 0.0298         | 28%                           | 27             | 0.0049         | 66.0 ± 5.3              | 13             | <0.0001        |
| F26E4.4    | Cell death regulator Aven                             | Mitochondria     | 7%                       | 57             | 0.0076         | 13%                           | 36             | 0.0666         | 270.0 ± 9.1             | 10             | <0.0001        |
| C56E6.1    | ABC superfamily transporter                           | Signaling        | 3%                       | 41             | 0.4018         | 0%                            | 45             | 0.8226         | 238.0 ± 12.5            | 11             | <0.0001        |
| K11B4.1    | Uncharacterized protein                               | Unkown           | 11%                      | 29             | 0.0082         | -8%                           | 47             | 0.1101         | 242.4 ± 6.2             | 11             | <0.0001        |
| B0491.5    | Uncharacterized protein                               | Unkown           | 10%                      | 40             | 0.0097         | 41%                           | 34             | <0.0001        | 172.8 ± 15.5            | 11             | <0.0001        |

RNAi inactivation of some identified genes during adult results in increased heat stress resistance, oxidative stress resistance, and reduced fecundity.

<sup>a</sup> Heat stress assays were performed at 35°C. Survival of animals treated with different RNAi were compared with those treated with the control RNAi using the log-rank method. Significant increases in heat stress resistance ( $p < 0.05$ ) were highlighted.

<sup>b</sup> Mean survival extension compared to animals treated with the control RNAi.

<sup>c</sup> Total numbers of animals scored.

<sup>d</sup>  $p$ -values were calculated using the log-rank method (Graphic Prism 4).

<sup>e</sup> Oxidative stress assays were performed by exposing animals to juglone (360 mM).

Survival of animals treated with different RNAi were compared with those treated with the control RNAi using the log-rank method. Significant increases in oxidative stress resistance ( $p < 0.05$ ) were highlighted.

<sup>f</sup> Brood sizes of animals treated with different RNAi were compared with those treated with the control RNAi using the *t*-test. Significant reductions in fecundity ( $p < 0.05$ ) were highlighted.

<sup>g</sup> Mean number of progeny produced by one hermaphrodite animals  $\pm$  standard error of mean.

<sup>h</sup> *p*-values were calculated using the *t*-test method (Graphic Prism 4).
